# Supplementary material for: Electrochemical reduction of bulk graphene oxide materials
Source: Royal Society of Chemistry journal article supplement (doi:10.1039/c6ra17469h), 2016-01-01
Supplement: c6ra17469h1.pdf [file c6ra17469h1.pdf]

Supporting materials for:

## Electrochemical Reduction of Bulk Graphene Oxide Materials

Xiayu Feng, Wufeng Chen, Lifeng Yan\*

CAS Key Laboratory of Soft Matter Chemistry and Department of Chemical Physics, Hefei National

5 Laboratory for Physical Sciences at the Microscale, University of Science and Technology of China.

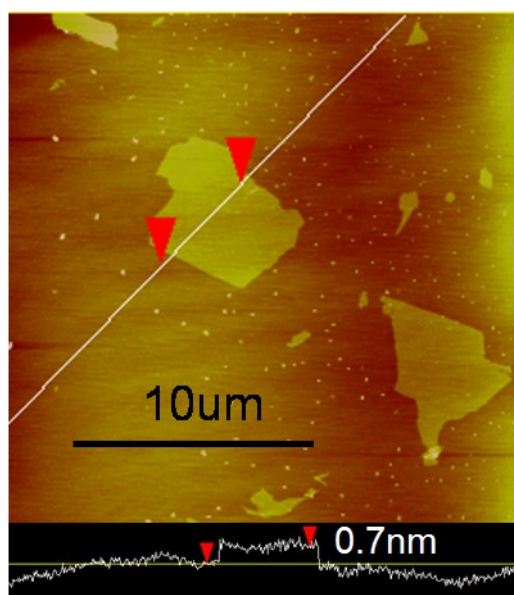

**Figure S1.** AFM image of GO nanosheets used in this study.

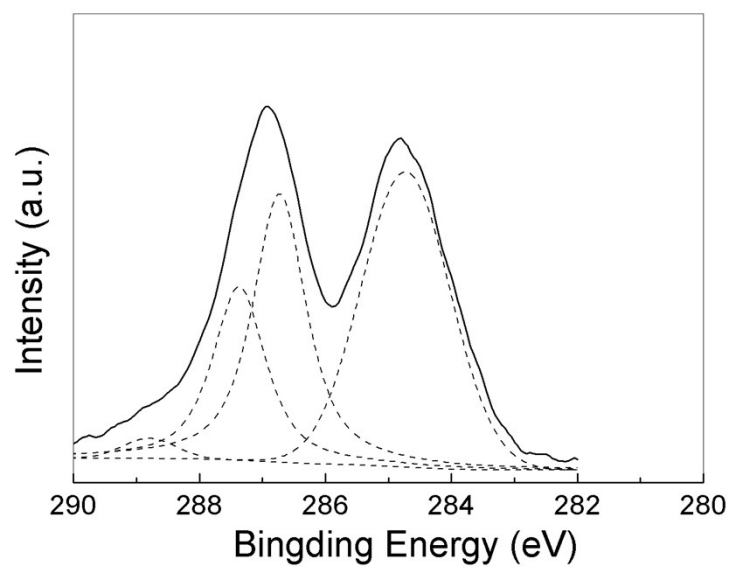

**Figure S2.** XPS pattern of GO film

5

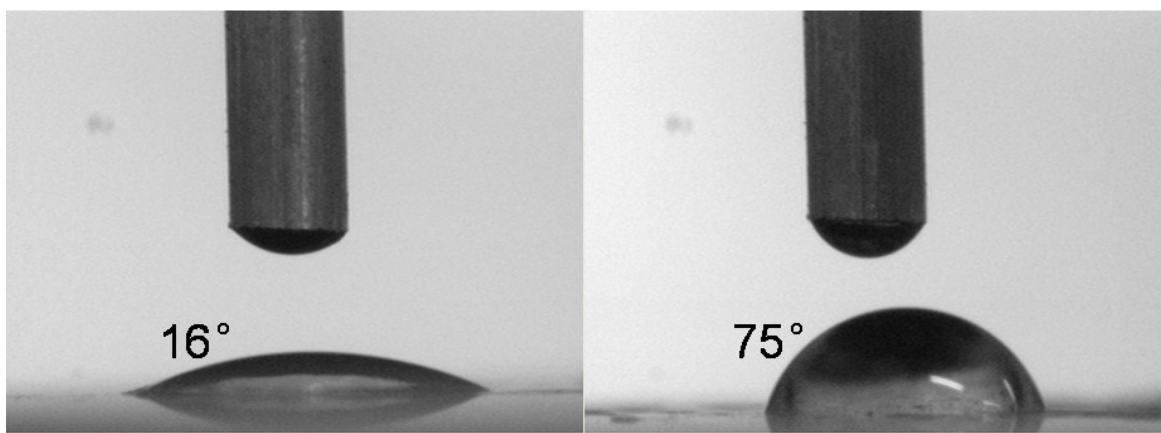

**Figure S3.** Contact angles measurement of water onto the surface of the as-prepared GO film (a) and ERGO film (b)

10

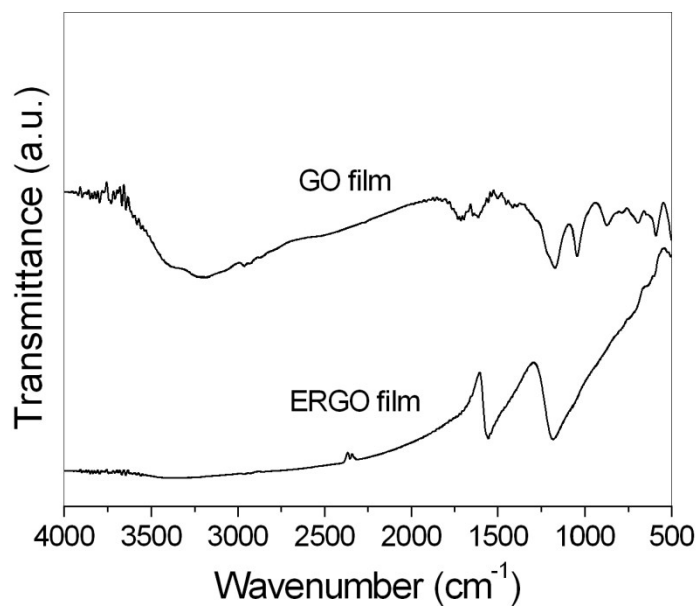

**Figure S4** FT-IR spectra of the as-prepared GO and ERGO films

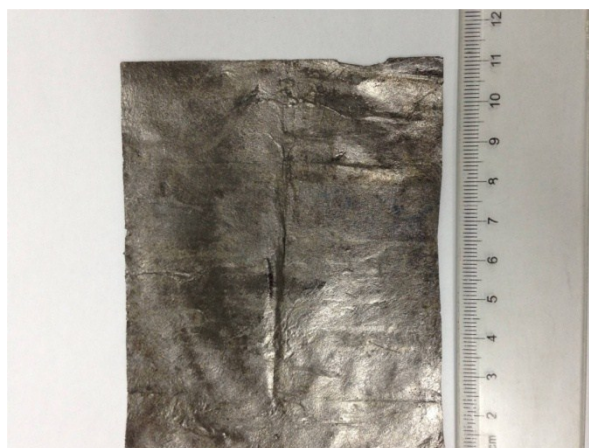

5 **Figure S5.** Electrochemical reduction preparation of rGO film covered on an irregular lens paper.

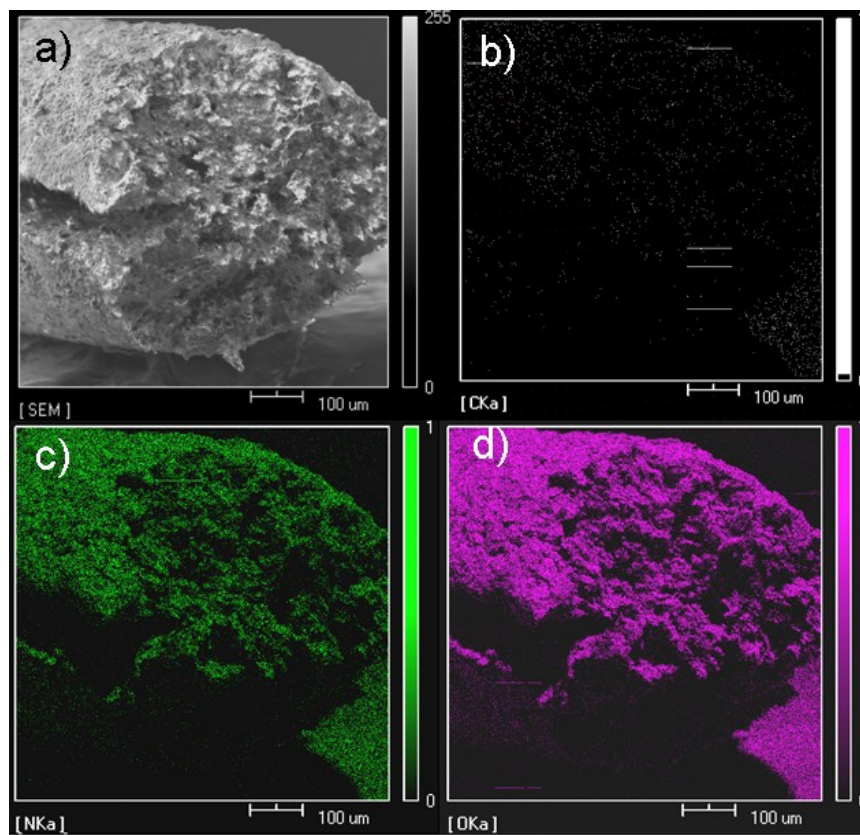

**Figure S6.** a) Preparation of silk fibroin and GO composites and the chemical reduction of them to SF/rGO fiber: SEM cross-section image and the relative elemental maps of C, N, and O, respectively.
